# Supplementary material for: Octadecyl acrylate-based self-supporting elastic phase change framework materials for the enhancement of photovoltaic conversion efficiency
Source: Royal Society of Chemistry journal article supplement (doi:10.1039/d4gc00974f), 2024-01-01
Supplement: d4gc00974f1.pdf [file d4gc00974f1.pdf]

# Octadecyl Acrylate-Based Self-Supporting Elastic Phase Change Framework Materials for the Enhancement of Photovoltaic Conversion Efficiency

Yongqiang Qian<sup>†a, b, c</sup>, Lei Tan<sup>†a</sup>, Wentao He<sup>a</sup>, Liling Liao<sup>a</sup>, Yongjia Wu<sup>a</sup>, Yiyang

Chen<sup>a</sup>, Dan Li<sup>a</sup>, Xu Zhang<sup>a</sup>, Guxia Wang<sup>d</sup>, Yen Wei<sup>a, e</sup>, Shengwei Guo<sup>\*a, b, c</sup>

a. School of Materials Science and Engineering, North Minzu University, Yinchuan 750021, China

b. International Scientific and Technological Cooperation Base of Industrial Solid Waste Cyclic Utilization and Advanced Materials, Yinchuan 750021, China

c. Key Laboratory of Polymer Materials and Manufacturing Technology, North Minzu University, Yinchuan 750021, China

d. School of Chemistry and Chemical Engineering, North Minzu University, Yinchuan 750021, China

e. Key Laboratory of Organic Optoelectronics and Molecular Engineering, Department of Chemistry, Tsinghua University, Beijing 100084, China

Table S1. The formulation of synthesized SS-PCAs and PCGs

| Entry | Crosslinking Alkyl length | Molar ratio of A18/ADA | Solvent phase/ (wt%) |
|-------|---------------------------|------------------------|----------------------|
| POT1  | C14                       | 9:1                    | DMAc/80              |
| POT1  | C14                       | 9:1                    | DMAc/80              |
| POT2  | C14                       | 8:2                    | DMAc/80              |

<sup>†</sup>These authors contributed equally.

\*Corresponding author: shengwei@nun.edu.cn (S. W. Guo)

|                       |     |     |         |
|-----------------------|-----|-----|---------|
| POT2'                 | C14 | 8:2 | THF/80  |
| POT3                  | C14 | 7:3 | DMAc/80 |
| POD2                  | C22 | 8:2 | DMAc/80 |
| POT1/EI8              | C14 | 9:1 | EI/80   |
| POT2/EI9 <sup>a</sup> | C14 | 8:2 | EI/90   |
| POT2/EI8              | C14 | 8:2 | EI/80   |
| POT2/EI7              | C14 | 8:2 | EI/70   |
| POT3/EI8              | C14 | 7:3 | EI/80   |
| POD2/EI9 <sup>a</sup> | C22 | 8:2 | EI/90   |
| POD2/EI8              | C22 | 8:2 | EI/80   |

---

<sup>a</sup> adsorption preparation;

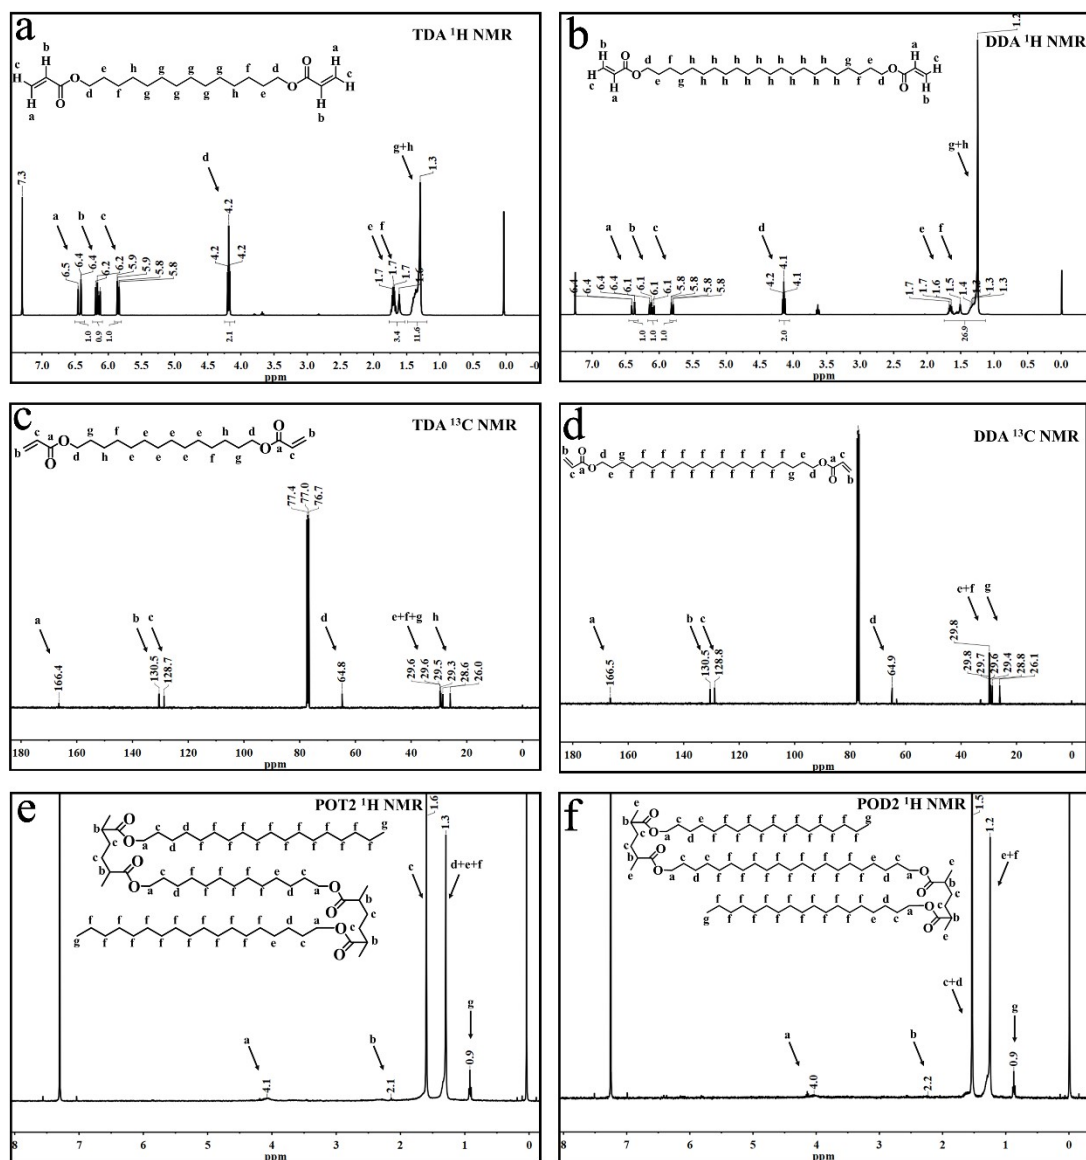

Figure 1S. The corresponding peak position and integral area according to  $^1\text{H}$  CMR and  $^{13}\text{C}$  NMR of TDA, DDA, POT2 and POD2.

Table S2. Component Group Contributions to Hansen Solubility Parameters<sup>[1]</sup>

| Structure group    | $F_{d,i}$ ( $J^{1/2}\text{cm}^{3/2}/\text{mol}$ ) | $F_{p,i}$ ( $J^{1/2}\text{cm}^{3/2}/\text{mol}$ ) | $E_{h,i}$ ( $J/\text{mol}$ ) |
|--------------------|---------------------------------------------------|---------------------------------------------------|------------------------------|
| -CH <sub>3</sub>   | 303                                               | 0                                                 | 0                            |
| -CH <sub>2</sub> - | 270                                               | 0                                                 | 0                            |
| =CH-               | 176                                               | 0                                                 | 0                            |
| -COO-              | 669                                               | 0                                                 | 5230                         |

Table S3. Thermal stabilities of TD, TDA, EI, POT2 and POT2/EI8

| Sample No. | Ta do (°C) | Tb dp (°C) | Mass loss (%) |
|------------|------------|------------|---------------|
| PA18       | 384        | 414        | 98            |
| TD         | 212        | 238        | 98            |
| TDA        | 403        | 429        | 99            |
| EI         | 192        | 226        | 97            |
| POT2       | 392        | 418        | 100           |
| POT2/EI8   | 199/380    | 229/418    | 98            |

<sup>a</sup>: The onset decomposition temperature; <sup>b</sup>: The fastest decomposition temperature.

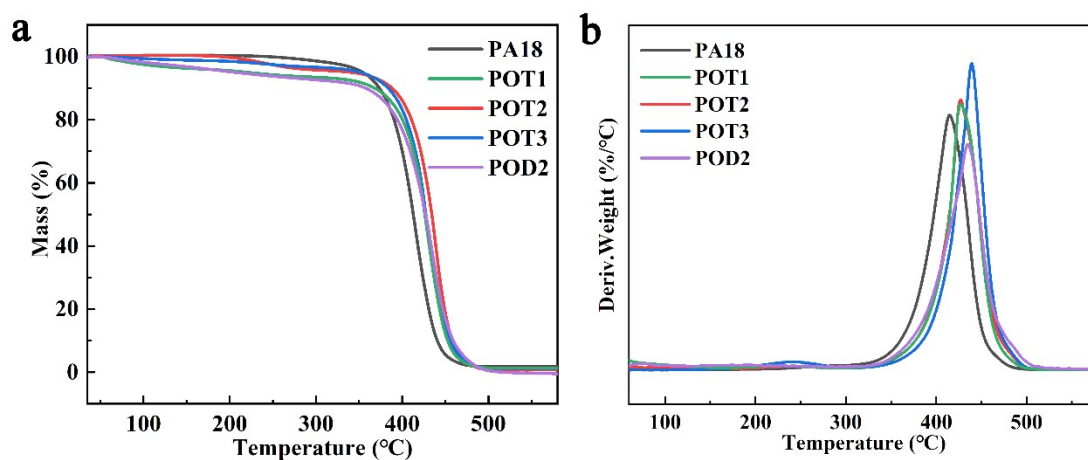

Figure 2S. (a) TG and (b) DTG curves of POTx and PODx.

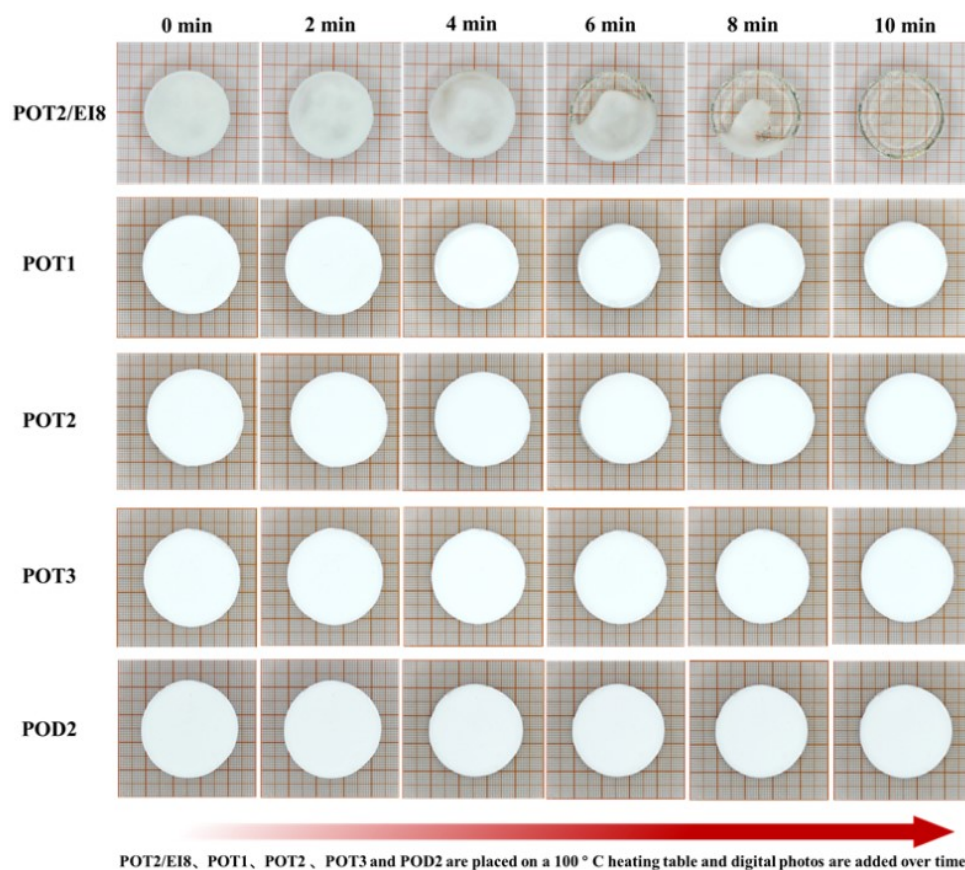

Figure 3S. Form-stability test of POTx and POT2/EI8 performed by heating

Table S4. DSC data of POT2, POT2/EI8 and the corresponding after 100 thermal cycles

| Entry                       | $\Delta H_m$<br>(J/g) | Ta mo<br>(°C) | Tb mp<br>(°C) | $\Delta H_c$<br>(J/g) | Tc co<br>(°C) | Td cp<br>(°C) |
|-----------------------------|-----------------------|---------------|---------------|-----------------------|---------------|---------------|
| POT2                        | 56                    | 21            | 38            | 58                    | 35            | 29            |
| POT2-100 thermal cycles     | 54                    | 22            | 39            | 56                    | 34            | 28            |
| POT2/EI8                    | 170                   | 23            | 37            | 165                   | 32            | 26            |
| POT2/EI8-100 thermal cycles | 168                   | 23            | 38            | 162                   | 31            | 27            |

<sup>a</sup>: Onset temperature of the melting peak. <sup>b</sup>: Peak temperature of the melting peak.

<sup>c</sup>: Onset temperature of the crystallization peak. <sup>d</sup>: Peak temperature of the crystallization peak.

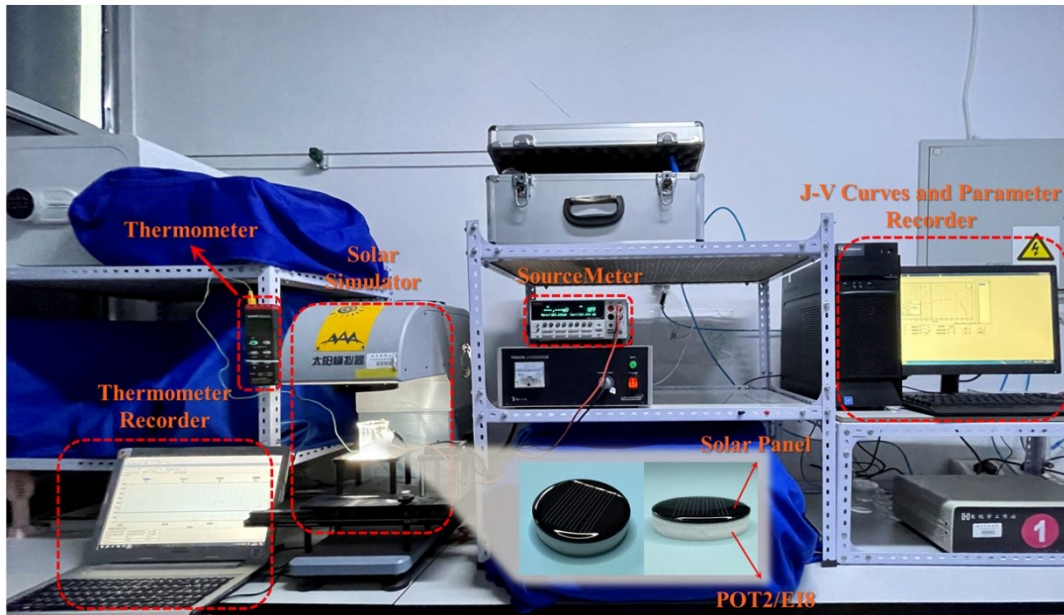

Figure 4S. The image of thermal management system for polycrystalline silicon photovoltaic cells.

- [1] a) J.-F. Li, Z.-L. Xu, H. Yang, C.-P. Feng, J.-H. Shi, *Journal of Applied Polymer Science* **2008**, 107, 4100; b) HANSEN C M., *Boca Raton: CRC Press* **2007**.
